# Supplementary material
Source: Elsevier journal article supplement (https://univ-rennes.hal.science/hal-01398046v1/file/mmc1.pdf)

## SUPPORTING INFORMATION

**Title** : Synthesis of a Trimannosylated-Equipped Archaeal Diether Lipid for the Development of Novel Glycoliposomes

**Author(s)**: Julie Barbeau, Loïc Lemiègre, Allan Quelen, Virginie Malard, Haifei Gao, Cristine Gonçalves, Mathieu Berchel, Paul-Alain Jaffrès, Chantal Pichon, Patrick Midoux,\* and Thierry Benvegna\*

Copies of NMR data

2

# Triallyl-benzyl-pentaerythritol (5)

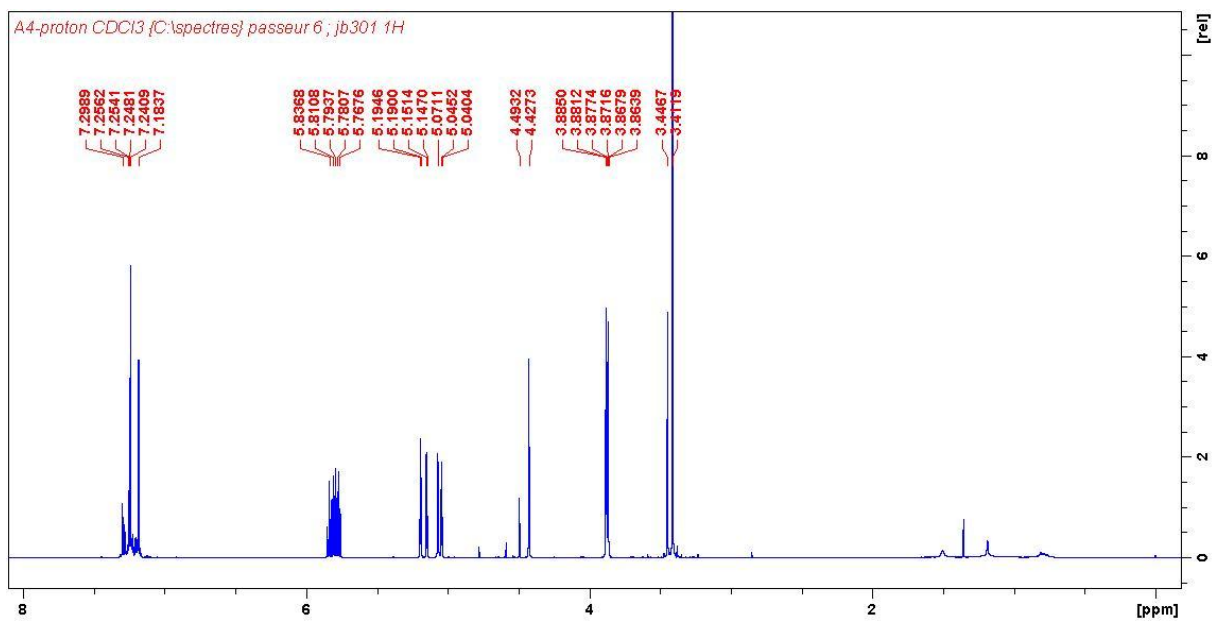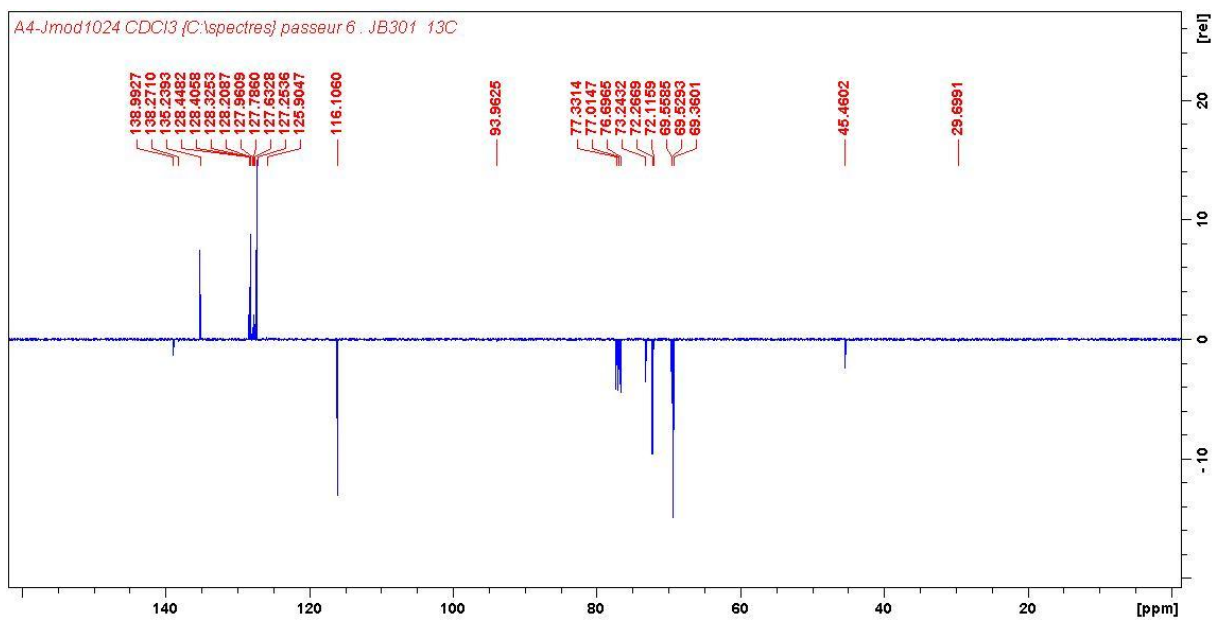

# Tri(3-hydroxypropyl)-benzyl-pentaerythritol (6):

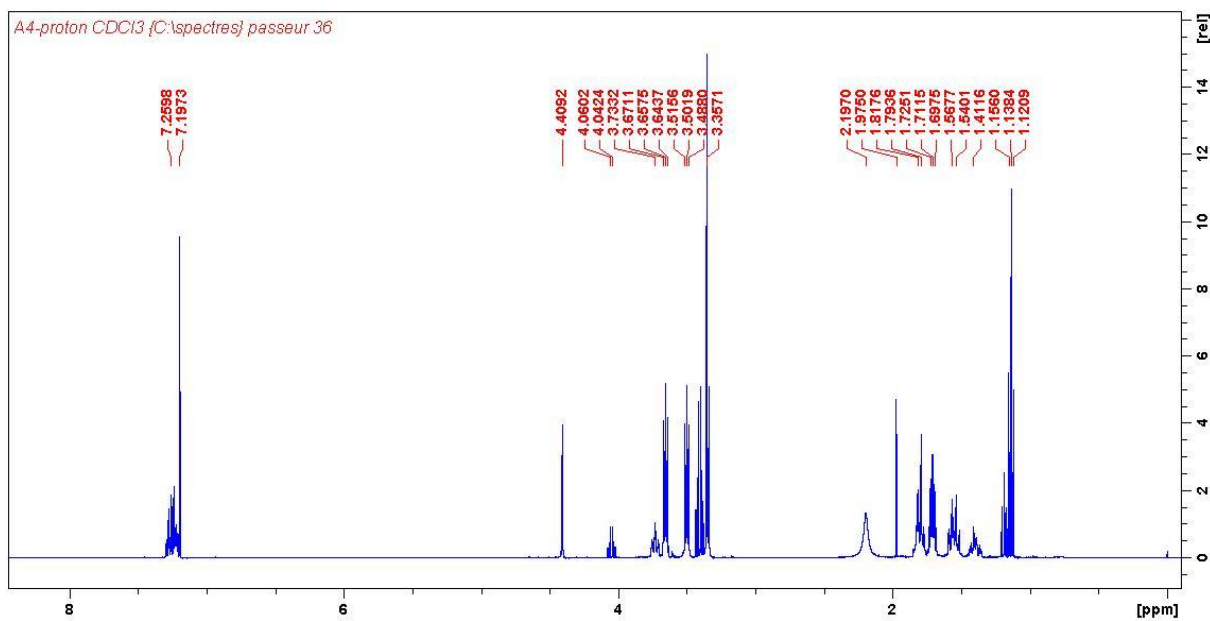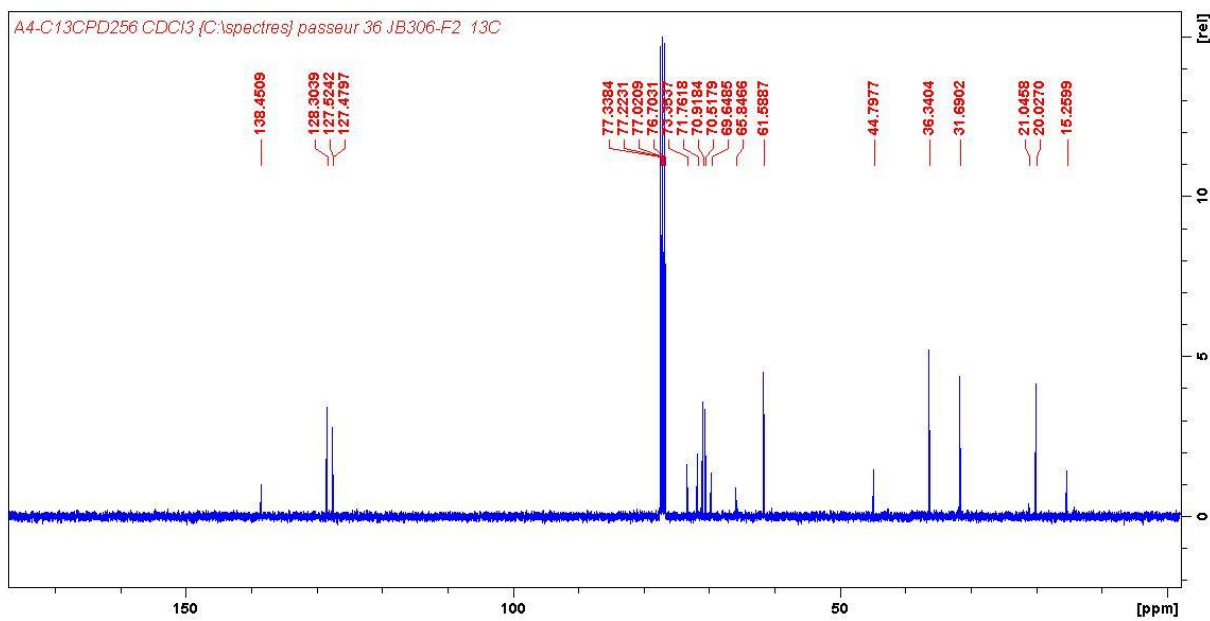

# Tri(3-allyloxypropyl)-benzyl-pentaerythritol (7):

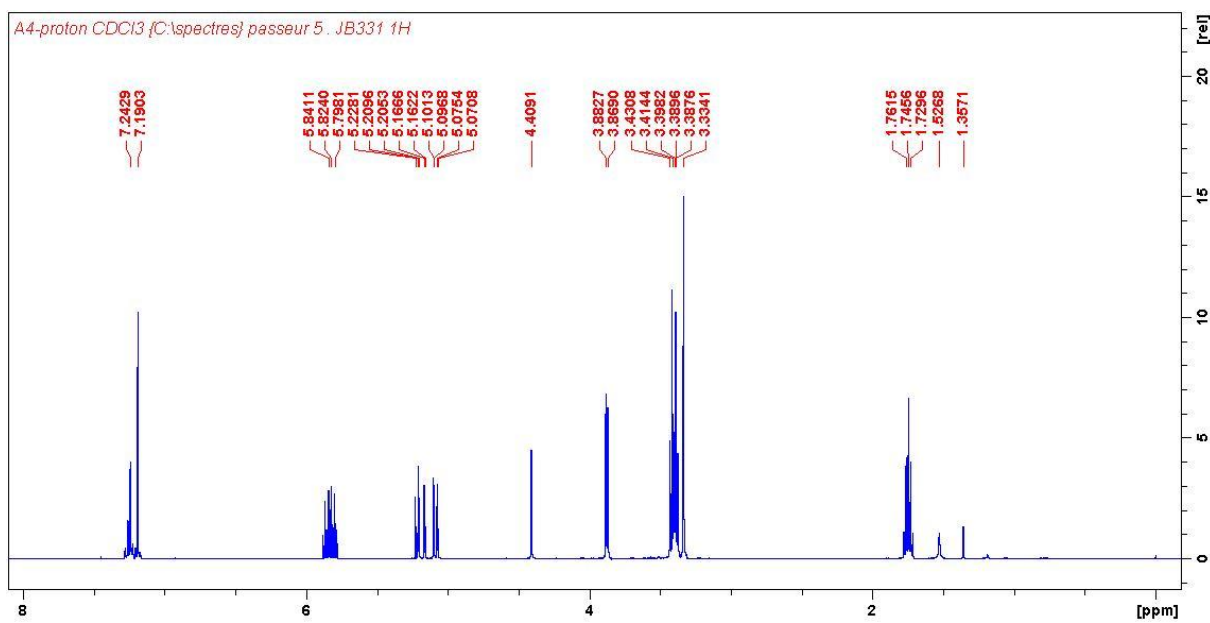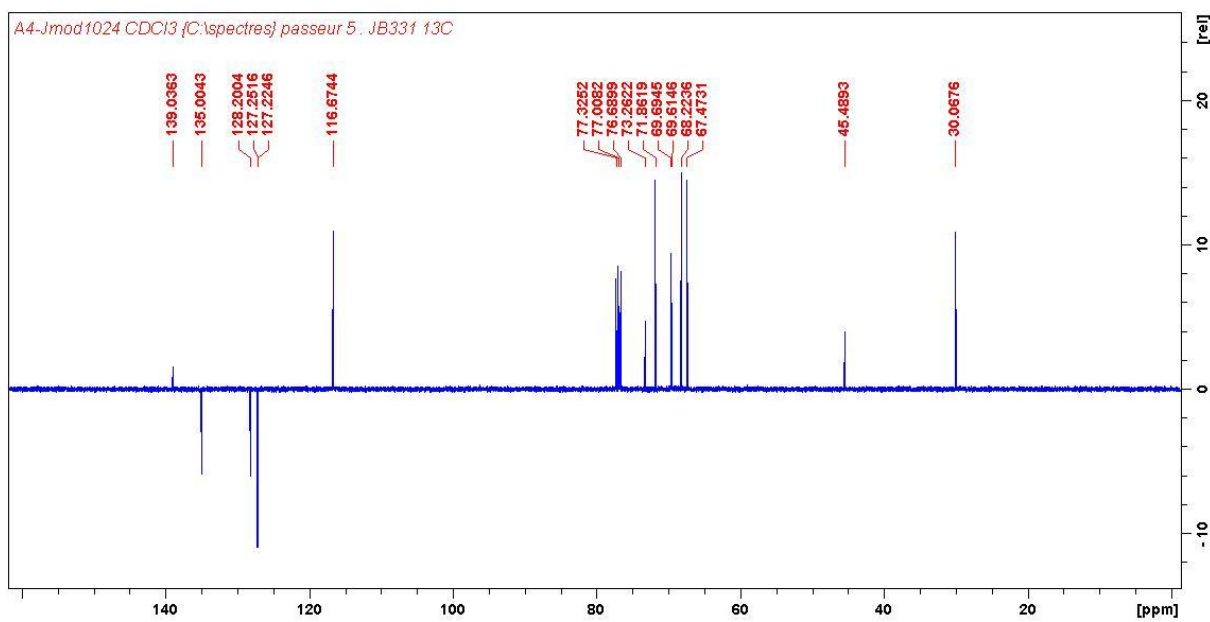

# Tri(3-hydroxypropoxypropyl)-benzyl-pentaerythritol (8):

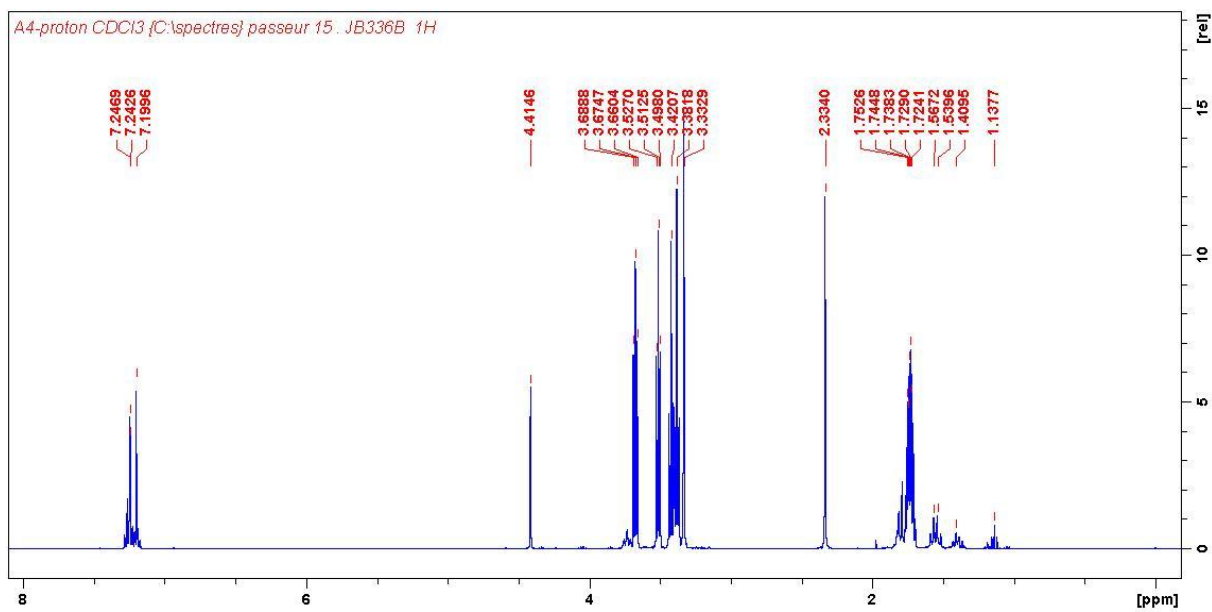

TriMan-CH<sub>2</sub>OBn (10):

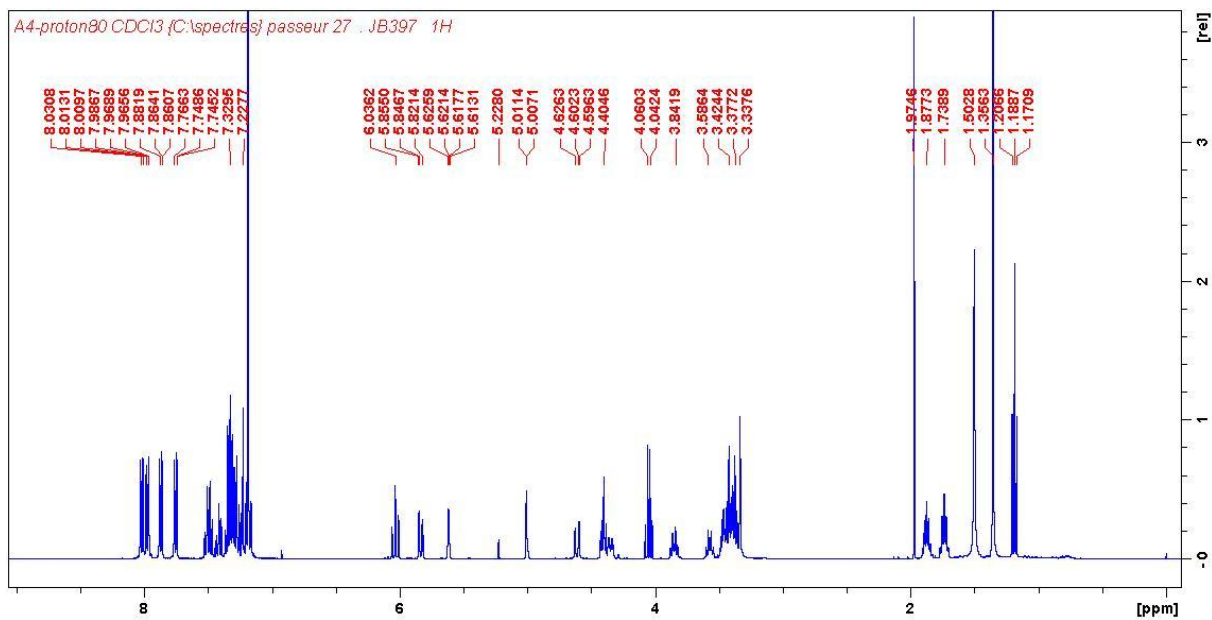

# TriMan-COOH (2):

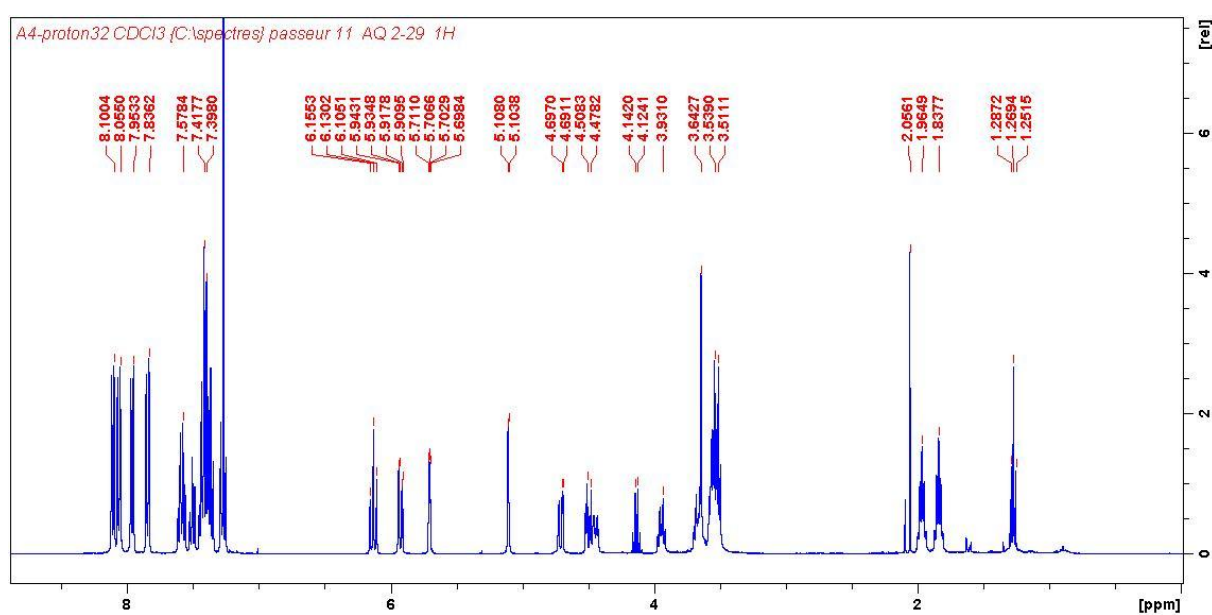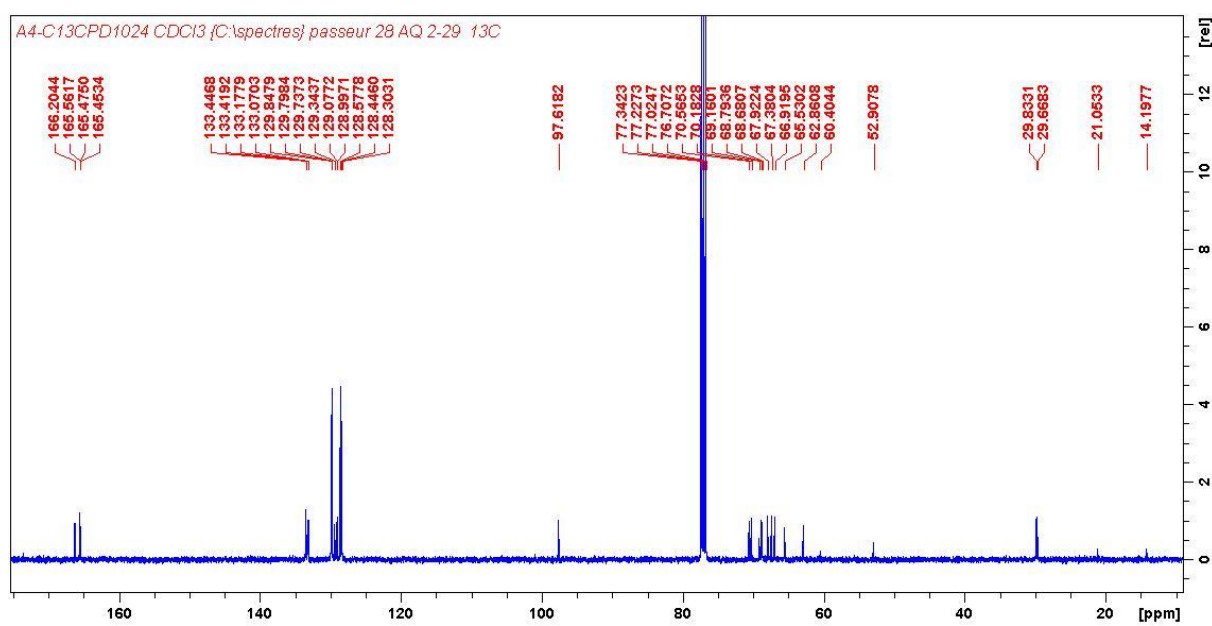

# N<sub>3</sub>-PEG<sub>350</sub>-diether (13):

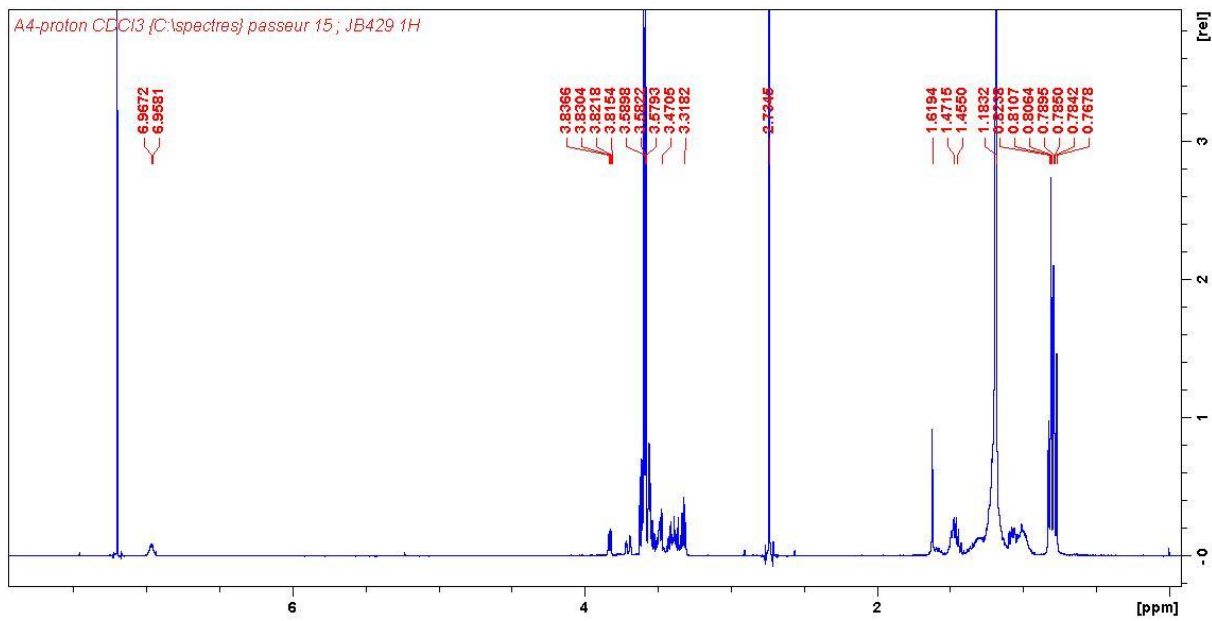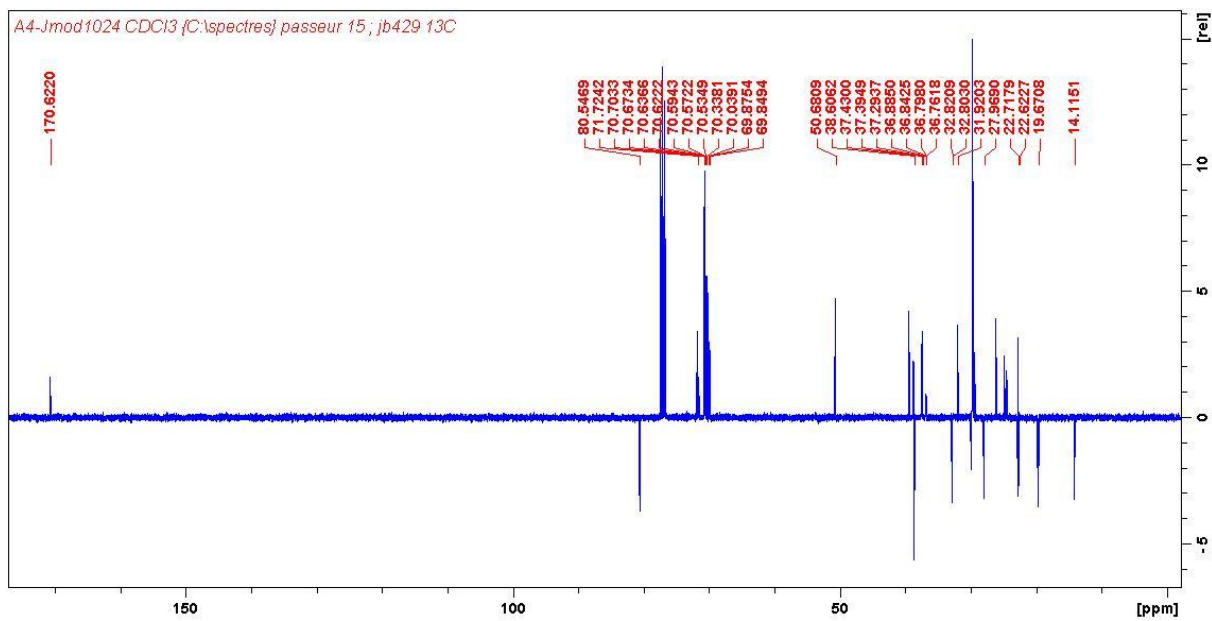



**NH<sub>2</sub>-PEG<sub>350</sub>-diether (3):**

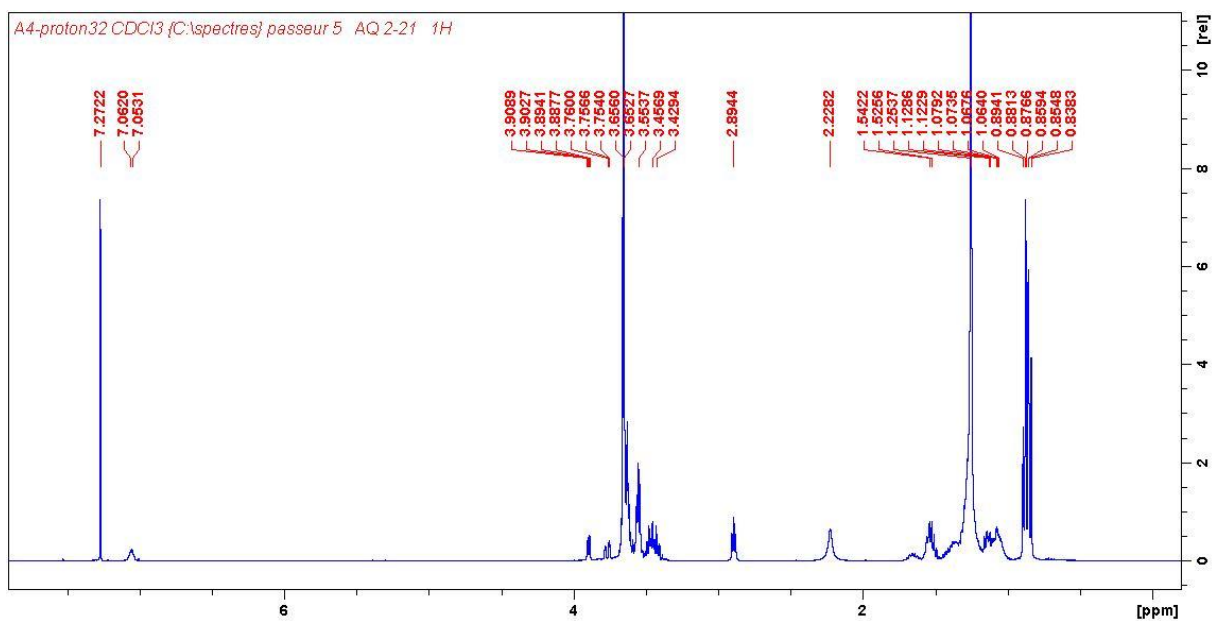

Perbenzoyl-TriMan-PEG<sub>350</sub>-diether (14):

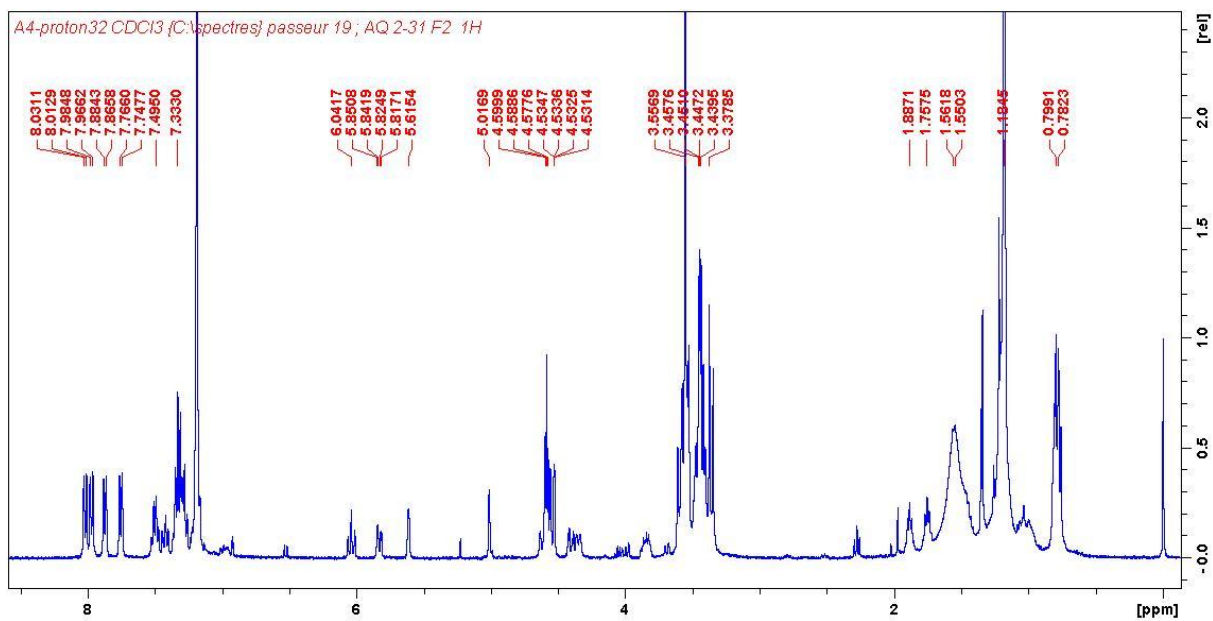

**TriMan-PEG<sub>350</sub>-diether (1):**

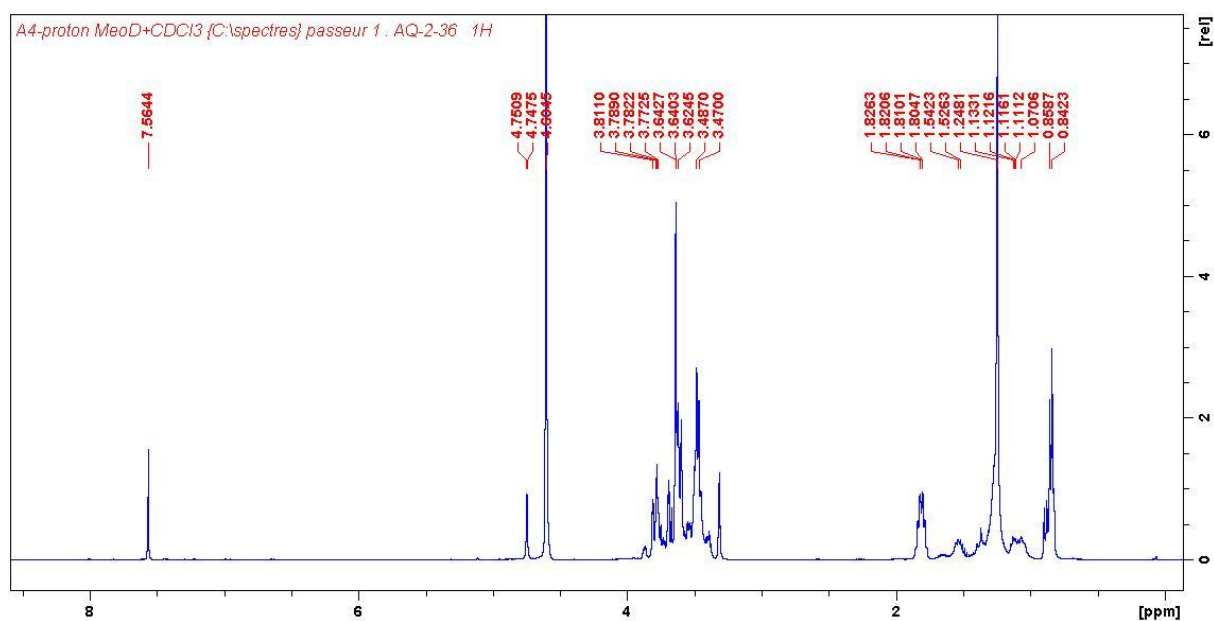

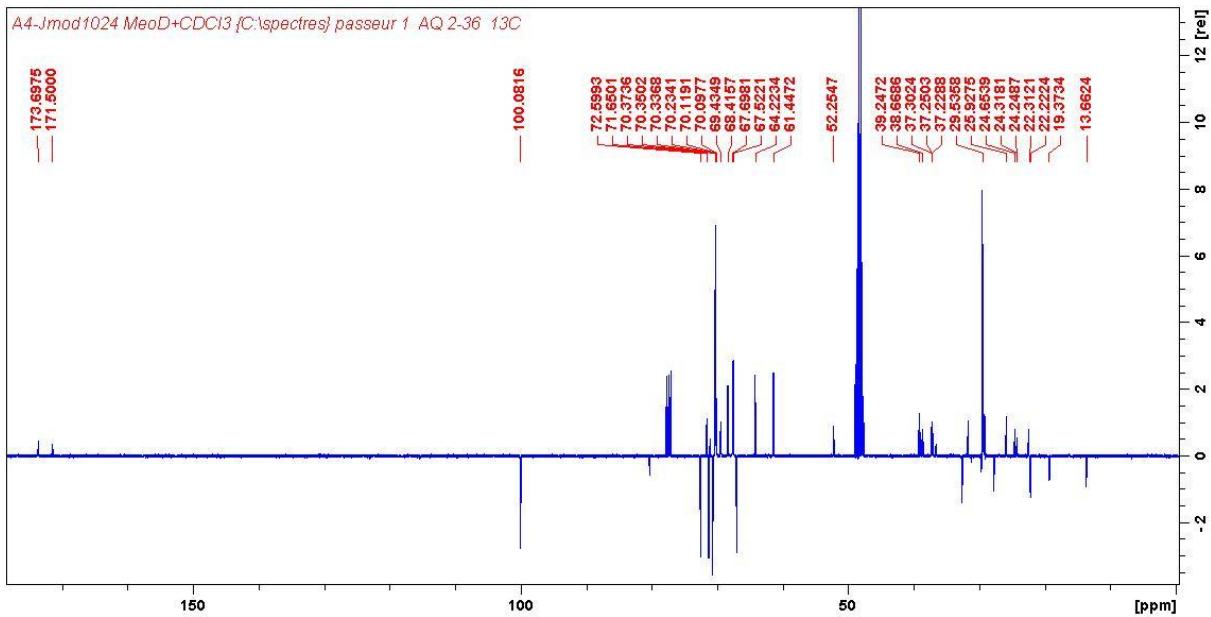

Supplement: mmc1 [file mmc1.pdf]
